# Supplementary material for: Cytotoxic effects of heated tobacco products (HTP) on human bronchial epithelial cells
Source: PubMed Central journal article supplement — Tob Control. 2018 Sep 5;27(Suppl 1):s26–9. doi: 10.1136/tobaccocontrol-2018-054317 (PMC6252481; doi:10.1136/tobaccocontrol-2018-054317), 2018-09-05
Supplement: tobaccocontrol-2018-054317supp002.pdf [file tobaccocontrol-2018-054317supp002.pdf]

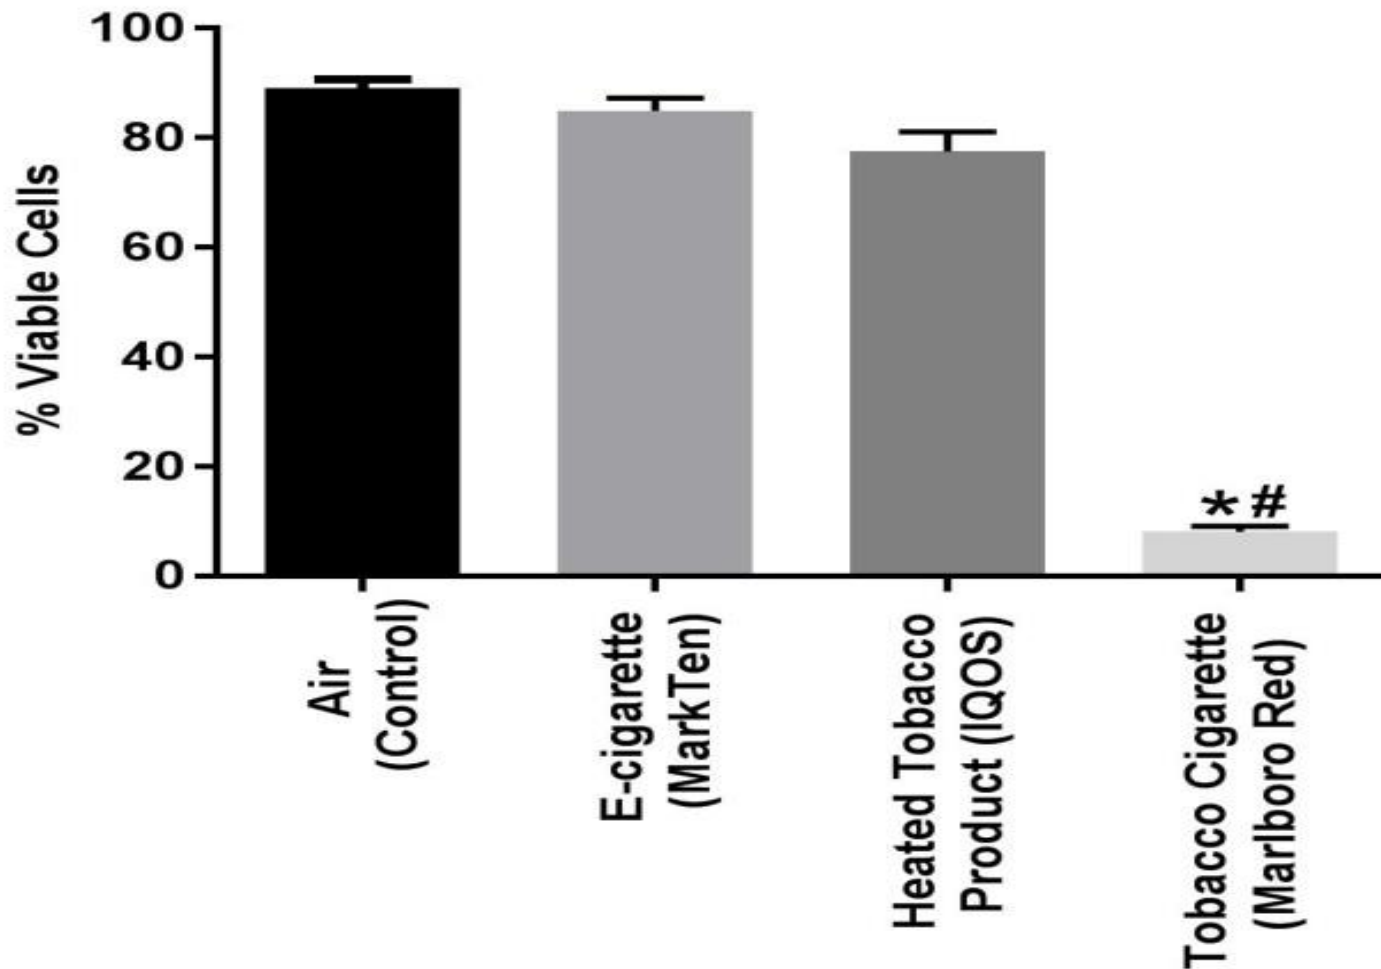

**Supplementary Figure 1.** Percent viable cells (trypan blue assay) from H292 bronchial epithelial cells directly exposed using an air–liquid interface to Heated Tobacco Product (HTP) emissions, e-cigarette aerosols, combustible tobacco smoke, and air (controls). Aerosol was generated from a MarkTen electronic cigarette (55 puffs). HTP emissions were generated from IQOS (12 puffs/heatstick). Smoke was generated by a Marlboro Red combustible cigarette (8 puffs/cigarette). \* indicates statistically significant difference as compared to the air control ( $p < 0.05$ ). # indicates statistically significant difference as compared to IQOS product.

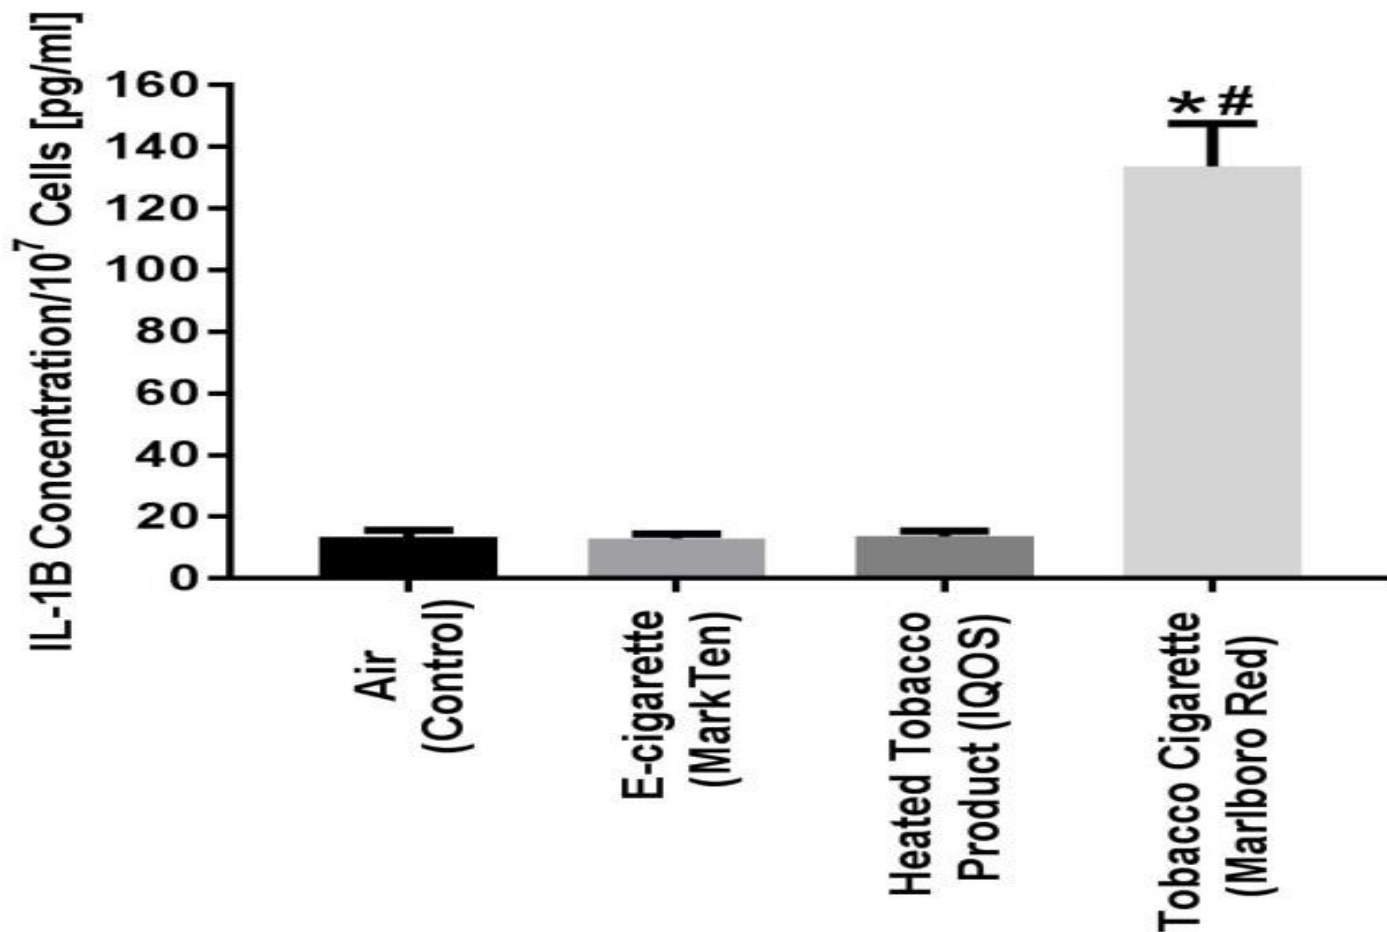

**Supplementary Figure 2.** IL-1 $\beta$  release from H292 bronchial epithelial cells directly exposed using an air–liquid interface to Heated Tobacco Product (HTP) emissions, e-cigarette aerosols, combustible tobacco smoke, and air (controls). Aerosol was generated from a MarkTen electronic cigarette (55 puffs). HTP emissions were generated from IQOS (12 puffs/heetstick). Smoke was generated by a Marlboro Red combustible cigarette (8 puffs/cigarette). Cytokine concentrations were adjusted for the number of live cells observed in the corresponding trypan blue assay. \* indicates statistically significant difference as compared to the air control ( $p < 0.05$ ). # indicates statistically significant difference as compared to IQOS product ( $p < 0.05$ ).

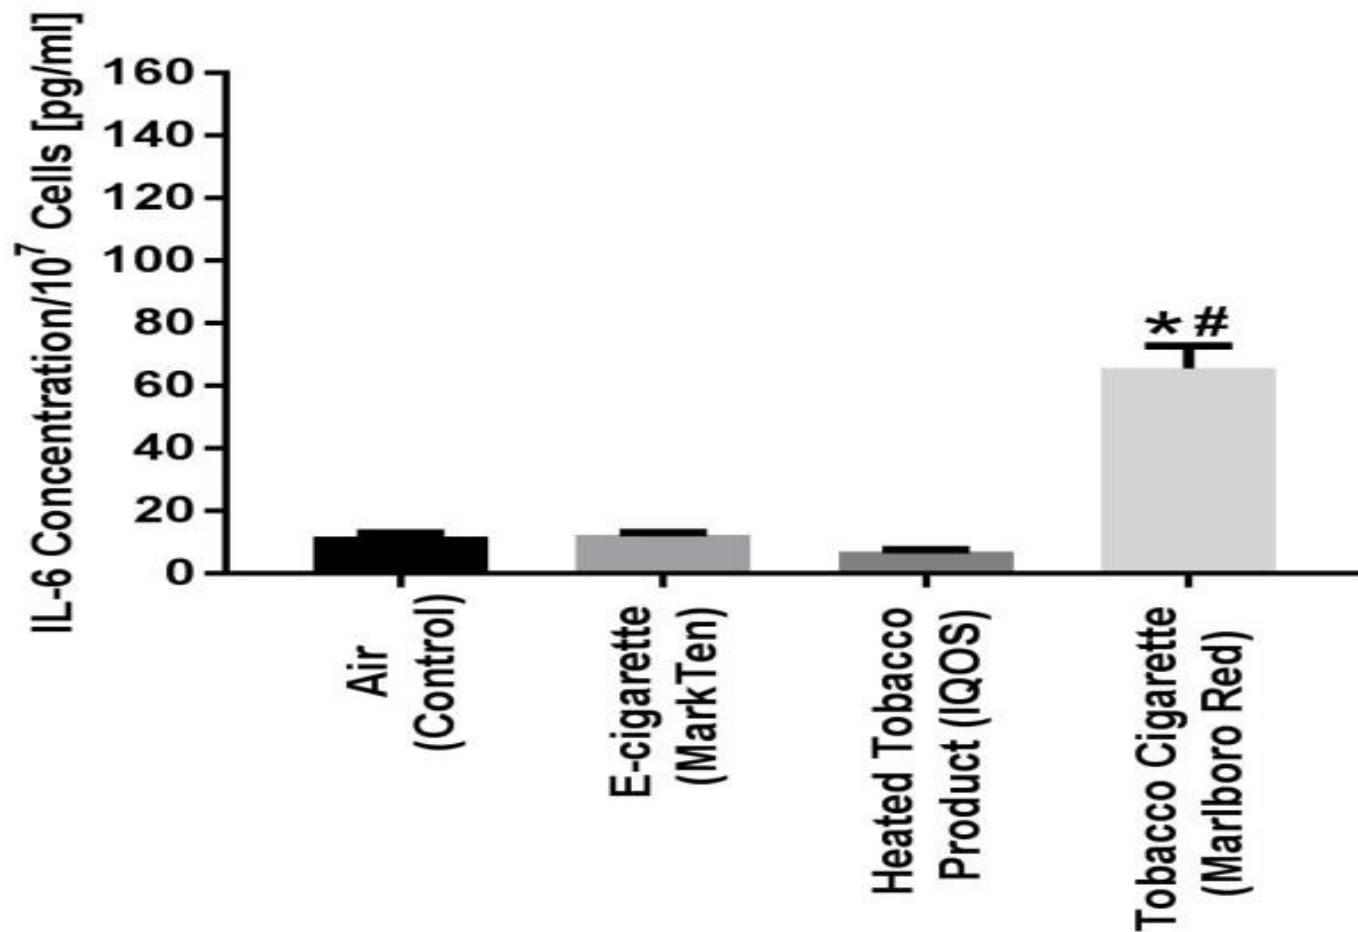

**Supplementary Figure 3.** IL-6 release from H292 bronchial epithelial cells directly exposed using an air-liquid interface to Heated Tobacco Product (HTP) emissions, e-cigarette aerosols, combustible tobacco smoke, and air (controls). Aerosol was generated from a MarkTen electronic cigarette (55 puffs). HTP emissions were generated from IQOS (12 puffs/heetstick). Smoke was generated by a Marlboro Red combustible cigarette (8 puffs/cigarette). Cytokine concentrations were adjusted for the number of live cells observed in the corresponding trypan blue assay. \* indicates statistically significant difference as compared to the air control ( $p < 0.05$ ). # indicates statistically significant difference as compared to IQOS product.
